# Supplementary material for: The Global Spine Care Initiative: resources to implement a spine care program
Source: Springer Nature journal article supplement (doi:10.1007/s00586-018-5725-7), 2018-08-27
Supplement: MOESM2 [file 16075868]

## The Global Spine Care Initiative: resources to implement a spine care program

### Online Supplemental File

Table 1. Consensus spreadsheet of the resources for spine care. *The four categories of resources (knowledge and skills, materials and equipment, human resources, facility and infrastructure) were matched with all classes of spine concerns. This information identifies what resources may be necessary to deliver care to match community spinal health care needs.*

| RESOURCES                                                                                                                                                      | CLASSES           |    |                                                                 |    |     |     |     |     |                       |      |      |                      |     |                              |    |    |
|----------------------------------------------------------------------------------------------------------------------------------------------------------------|-------------------|----|-----------------------------------------------------------------|----|-----|-----|-----|-----|-----------------------|------|------|----------------------|-----|------------------------------|----|----|
|                                                                                                                                                                | Preventive health |    | Non-specific spine pain, with or without functional limitations |    |     |     |     |     | Neurological concerns |      |      | Structural deformity |     | Severe or systemic pathology |    |    |
|                                                                                                                                                                | 0a                | 0b | Ia                                                              | Ib | IIa | IIb | IIc | IId | IIIa                  | IIIb | IIIc | IVa                  | IVb | Va                           | Vb | Vc |
| Follow care pathway instructions, know when to refer or coordinate care                                                                                        | x                 | x  | x                                                               | x  | x   | x   | x   | x   | x                     | x    | x    | x                    | x   | x                            | x  | x  |
| Preliminary (triage) screening history and exam, recognize signs of serious or systemic pathology, psychosocial risk factors, triage to appropriate spine care | x                 | x  | x                                                               | x  | x   | x   | x   | x   | x                     | x    | x    | x                    | x   | x                            | x  | x  |
| Ability to perform basic life support and spine-related emergency skills                                                                                       |                   |    | x                                                               | x  | x   | x   | x   | x   | x                     | x    | x    | x                    | x   | x                            | x  | x  |
| Record keeping and other technology skills                                                                                                                     | x                 | x  | x                                                               | x  | x   | x   | x   | x   | x                     | x    | x    | x                    | x   | x                            | x  | x  |
| Skills to recognize, screen public health issues                                                                                                               | x                 | x  | x                                                               | x  | x   | x   | x   | x   | x                     | x    | x    | x                    | x   | x                            | x  | x  |
| Extensive knowledge about spinal conditions                                                                                                                    |                   |    |                                                                 |    | x   | x   | x   | x   | x                     | x    | x    | x                    | x   | x                            | x  | x  |
| Detailed spine history and exam, triage skills, triage to appropriate spine care                                                                               |                   |    | x                                                               | x  | x   | x   | x   | x   | x                     | x    | x    | x                    | x   | x                            | x  | x  |
| Educate person about spine condition                                                                                                                           | x                 | x  | x                                                               | x  | x   | x   | x   | x   | x                     | x    | x    | x                    | x   | x                            | x  | x  |
| Educate person about prevention                                                                                                                                | x                 | x  | x                                                               | x  | x   | x   | x   | x   | x                     | x    | x    | x                    | x   | x                            | x  | x  |
| Educate about active therapies and self-care                                                                                                                   | x                 | x  | x                                                               | x  | x   | x   | x   | x   | x                     | x    | x    | x                    | x   | x                            | x  | x  |
| Perform passive therapies (manipulation, acupuncture, etc)                                                                                                     |                   |    | x                                                               | x  | x   | x   | x   | x   | x                     |      | x    |                      |     |                              |    |    |
| Skills to address psychosocial flags                                                                                                                           | x                 | x  | x                                                               | x  | x   | x   | x   | x   | x                     | x    | x    | x                    | x   | x                            | x  | x  |
| Skills to screen for and manage risk factors and comorbidities                                                                                                 | x                 | x  | x                                                               | x  | x   | x   | x   | x   | x                     | x    | x    | x                    | x   | x                            | x  | x  |
| Psychological and social therapies                                                                                                                             |                   |    |                                                                 |    | x   | x   | x   | x   | x                     | x    | x    | x                    | x   |                              |    |    |
| Over the counter medications (e.g., recommend NSAIDs)                                                                                                          |                   |    | x                                                               | x  | x   | x   | x   | x   | x                     | x    | x    |                      | x   | x                            | x  | x  |
| Prescription medications (Opioids, or other advanced pharmacology)                                                                                             |                   |    |                                                                 |    | x   | x   | x   | x   | x                     | x    | x    |                      | x   | x                            | x  | x  |
| Basic Diagnostic imaging (x-ray) interpretation                                                                                                                |                   |    |                                                                 |    |     | x   | x   | x   | x                     | x    | x    | x                    | x   | x                            | x  | x  |
| Advanced Diagnostic imaging (advanced MRI, CT, etc) interpretation                                                                                             |                   |    |                                                                 |    |     |     | x   | x   | x                     | x    | x    | x                    | x   | x                            | x  | x  |
| Laboratory testing interpretation                                                                                                                              |                   |    |                                                                 |    |     | x   | x   | x   | x                     | x    | x    |                      | x   | x                            | x  | x  |
| Refer to specialist to manage comorbidities (when indicated)                                                                                                   |                   |    |                                                                 |    |     | x   | x   | x   | x                     | x    | x    |                      | x   | x                            | x  | x  |
| Refer to surgery (when indicated)                                                                                                                              |                   |    |                                                                 |    |     |     |     | x   | x                     | x    | x    |                      | x   | x                            | x  | x  |
| Surgery skills (minor surgery and injections)                                                                                                                  |                   |    |                                                                 |    |     |     |     | x   | x                     | x    | x    |                      | x   | x                            | x  | x  |
| Surgery skills (major surgery) and advanced medical/emergency care                                                                                             |                   |    |                                                                 |    |     |     |     |     |                       | x    |      |                      | x   | x                            | x  | x  |
| Skills to work with multiple disciplines to deliver advanced coordinated care                                                                                  |                   |    |                                                                 |    |     | x   |     | x   |                       | x    | x    |                      | x   | x                            | x  | x  |

| RESOURCES                                                                                                                                       | CLASSES           |    |                                                       |    |     |     |     |     |                       |      |      |                      |     |                              |    |    |
|-------------------------------------------------------------------------------------------------------------------------------------------------|-------------------|----|-------------------------------------------------------|----|-----|-----|-----|-----|-----------------------|------|------|----------------------|-----|------------------------------|----|----|
|                                                                                                                                                 | Preventive health |    | Non-specific spine pain and/or functional limitations |    |     |     |     |     | Neurological concerns |      |      | Structural deformity |     | Severe or systemic pathology |    |    |
|                                                                                                                                                 | 0a                | 0b | Ia                                                    | Ib | IIa | IIb | IIc | IId | IIIa                  | IIIb | IIIc | IVa                  | IVb | Va                           | Vb | Vc |
| Clinic office equipment and furniture                                                                                                           |                   |    | x                                                     | x  | x   | x   | x   | x   | x                     | x    | x    | x                    | x   | x                            | x  | x  |
| Passive therapy equipment (treatment table, hot/cold packs, acupuncture needles)                                                                |                   |    | x                                                     | x  | x   | x   | x   | x   | x                     |      | x    | x                    |     |                              |    |    |
| Sanitation supplies                                                                                                                             |                   |    | x                                                     | x  | x   | x   | x   | x   | x                     | x    | x    | x                    | x   | x                            | x  | x  |
| Exam, treatment, basic emergency supplies                                                                                                       |                   |    | x                                                     | x  | x   | x   | x   | x   | x                     | x    | x    | x                    | x   | x                            | x  | x  |
| Access to non-opioid analgesics, muscle relaxants                                                                                               |                   |    | x                                                     | x  | x   | x   | x   | x   | x                     | x    | x    |                      | x   | x                            | x  | x  |
| Pharmacy or access to advanced pharmacology or other medications                                                                                |                   |    |                                                       |    |     | x   | x   | x   | x                     | x    | x    |                      | x   | x                            | x  | x  |
| Emergency supplies (e.g., for transport, spine board, stiff collar)                                                                             |                   |    |                                                       |    |     |     | x   |     |                       | x    |      |                      | x   | x                            |    | x  |
| Surgical and invasive outpatient procedure equipment                                                                                            |                   |    |                                                       |    |     |     |     | x   | x                     | x    | x    |                      | x   | x                            | x  | x  |
| Advanced surgical equipment                                                                                                                     |                   |    |                                                       |    |     |     |     |     |                       | x    | x    |                      | x   | x                            | x  | x  |
| Diagnostic imaging (radiography)                                                                                                                |                   |    |                                                       |    |     | x   | x   | x   | x                     | x    | x    | x                    | x   | x                            | x  | x  |
| Advanced diagnostic imaging (advanced, MRI, etc)                                                                                                |                   |    |                                                       |    |     |     |     | x   | x                     | x    | x    |                      |     | x                            | x  | x  |
| Laboratory                                                                                                                                      |                   |    |                                                       |    |     | x   | x   | x   | x                     | x    | x    |                      | x   | x                            | x  | x  |
| Surgical supplies for secondary and/or tertiary care                                                                                            |                   |    |                                                       |    |     |     |     | x   | x                     | x    | x    |                      | x   | x                            | x  | x  |
| Technological resources (electronic communications, EMR, data registry, etc)                                                                    | x                 | x  | x                                                     | x  | x   | x   | x   | x   | x                     | x    | x    | x                    | x   | x                            | x  | x  |
| RESOURCES                                                                                                                                       | CLASSES           |    |                                                       |    |     |     |     |     |                       |      |      |                      |     |                              |    |    |
| Human resources                                                                                                                                 | Preventive health |    | Non-specific spine pain and/or functional limitations |    |     |     |     |     | Neurological concerns |      |      | Structural deformity |     | Severe or systemic pathology |    |    |
|                                                                                                                                                 | 0a                | 0b | Ia                                                    | Ib | IIa | IIb | IIc | IId | IIIa                  | IIIb | IIIc | IVa                  | IVb | Va                           | Vb | Vc |
|                                                                                                                                                 |                   |    |                                                       |    |     |     |     |     |                       |      |      |                      |     |                              |    |    |
| Office support staff, record keeping staff                                                                                                      |                   |    | x                                                     | x  | x   | x   | x   | x   | x                     | x    | x    | x                    | x   | x                            | x  | x  |
| Health care support staff, nurse, aide, or technician                                                                                           |                   |    | x                                                     | x  | x   | x   | x   | x   | x                     | x    | x    | x                    | x   | x                            | x  | x  |
| Person with minimal health training in screening to triage spine conditions                                                                     | x                 | x  | x                                                     | x  |     |     |     |     |                       |      |      |                      |     |                              |    |    |
| Person with training to deliver community health spine programs for primary and secondary prevention                                            | x                 | x  | x                                                     | x  |     |     |     |     |                       |      |      |                      |     |                              |    |    |
| Health care provider with training in spine care at primary care level                                                                          |                   |    | x                                                     | x  | x   | x   | x   | x   | x                     | x    | x    | x                    |     |                              |    |    |
| Laboratory technician (or provider with skills)                                                                                                 |                   |    |                                                       |    |     | x   | x   | x   | x                     | x    | x    |                      | x   | x                            | x  | x  |
| Diagnostic imaging technician (or provider with skills)                                                                                         |                   |    |                                                       |    | x   | x   | x   | x   | x                     | x    | x    | x                    | x   | x                            | x  | x  |
| Pharmacist or pharmacy technician                                                                                                               |                   |    |                                                       |    | x   | x   | x   | x   | x                     | x    | x    |                      | x   | x                            | x  | x  |
| Support staff for Specialists (surgical nurse, etc)                                                                                             |                   |    |                                                       |    |     |     |     | x   | x                     | x    | x    |                      | x   | x                            | x  | x  |
| Specialists (Internal Medicine, OBGyn, Orthopedic Surgeon, General Surgeon, Emergency, etc)                                                     |                   |    |                                                       |    |     |     |     |     |                       |      |      |                      |     | x                            | x  | x  |
| Specialists with training in spine care at secondary care level                                                                                 |                   |    |                                                       |    |     |     |     | x   | x                     | x    | x    |                      | x   |                              |    |    |
| Advanced specialists and sub-specialists with training in spine care at a tertiary care level, including emergency spine surgery, imaging, etc. |                   |    |                                                       |    |     |     |     | x   |                       | x    |      |                      | x   | x                            | x  | x  |

| RESOURCES                                                   | CLASSES           |    |                                                       |    |     |     |     |     |                       |      |      |                      |     |                              |    |    |
|-------------------------------------------------------------|-------------------|----|-------------------------------------------------------|----|-----|-----|-----|-----|-----------------------|------|------|----------------------|-----|------------------------------|----|----|
| Facility and infrastructure                                 | Preventive health |    | Non-specific spine pain and/or functional limitations |    |     |     |     |     | Neurological concerns |      |      | Structural deformity |     | Severe or systemic pathology |    |    |
|                                                             | 0a                | 0b | Ia                                                    | Ib | IIa | IIb | IIc | IId | IIIa                  | IIIb | IIIc | IVa                  | IVb | Va                           | Vb | Vc |
| Community Health and Public Health Programs                 | x                 | x  | x                                                     | x  | x   | x   | x   | x   | x                     | x    | x    | x                    | x   |                              |    |    |
| Health care clinic                                          | x                 | x  | x                                                     | x  | x   | x   | x   | x   | x                     | x    | x    | x                    | x   | x                            | x  | x  |
| Pharmacy or dispensary                                      |                   |    | x                                                     | x  | x   | x   | x   | x   |                       | x    | x    |                      | x   | x                            | x  | x  |
| Hospital or facility for surgery and advanced interventions |                   |    |                                                       |    |     |     |     | x   | x                     | x    | x    |                      | x   | x                            | x  | x  |
| Emergency/Trauma facility                                   |                   |    |                                                       |    | x   |     |     | x   | x                     | x    | x    |                      | x   | x                            | x  | x  |
| Advanced specialty hospital or facility                     |                   |    |                                                       |    |     |     |     |     |                       | x    |      |                      | x   | x                            | x  | x  |

**Table 2** Resources checklist. Based upon the table above, the following is a proposed checklist of resources that are needed to deliver primary spine care.

| <b>Primary Spine Care Resources Checklist</b>                                                                                                                                  | <b>Present?</b> |           |
|--------------------------------------------------------------------------------------------------------------------------------------------------------------------------------|-----------------|-----------|
|                                                                                                                                                                                | <b>yes</b>      | <b>no</b> |
| <b>Knowledge and skills of health care providers</b>                                                                                                                           |                 |           |
| Skills to work with multiple disciplines to deliver advanced coordinated care                                                                                                  |                 |           |
| Follow care pathway instructions, know when to refer or coordinate care                                                                                                        |                 |           |
| Has record keeping and technology skills                                                                                                                                       |                 |           |
| Extensive knowledge about spinal conditions                                                                                                                                    |                 |           |
| Able to recognize, screen public health issues                                                                                                                                 |                 |           |
| Able to educate patient about spine condition diagnosis and prognosis                                                                                                          |                 |           |
| Able to educate patient about prevention                                                                                                                                       |                 |           |
| Able to educate patient about active therapies and self-care                                                                                                                   |                 |           |
| Able to interpret laboratory testing                                                                                                                                           |                 |           |
| Able to obtain and interpret detailed spine history and exam, triage skills, triage to appropriate spine care                                                                  |                 |           |
| Able to perform preliminary (triage) screening history and exam, recognize signs of serious or systemic pathology, psychosocial risk factors, triage to appropriate spine care |                 |           |
| Able to triage skills, send patient to appropriate spine care                                                                                                                  |                 |           |
| Able to order or perform basic diagnostic imaging (x-ray)                                                                                                                      |                 |           |
| Able to interpret basic diagnostic imaging (x-ray)                                                                                                                             |                 |           |
| Basic Diagnostic imaging (x-ray) interpretation                                                                                                                                |                 |           |
| Perform passive spine treatment therapies (manipulation, acupuncture, etc)                                                                                                     |                 |           |
| Has skills to screen for and manage risk factors and comorbidities                                                                                                             |                 |           |
| Able to recommend over the counter medications (e.g., NSAIDs)                                                                                                                  |                 |           |
| Prescription medications (Opioids, or other advanced pharmacology)                                                                                                             |                 |           |
| Able to apply basic psychological and social therapies                                                                                                                         |                 |           |
| Has skills to address psychosocial flags or able to refer to psychosocial care                                                                                                 |                 |           |
| Has access to a provider who has surgery skills (minor surgery and injections)                                                                                                 |                 |           |
| Able to refer to specialist to manage comorbidities (when indicated)                                                                                                           |                 |           |
| Able to refer to surgery (when indicated)                                                                                                                                      |                 |           |
| Ability to perform basic life support and spine-related emergency skills                                                                                                       |                 |           |
|                                                                                                                                                                                |                 |           |
| <b>Materials and equipment</b>                                                                                                                                                 | <b>yes</b>      | <b>no</b> |
| Emergency supplies (e.g., for transport, spine board, stiff collar)                                                                                                            |                 |           |
| Advanced diagnostic imaging (advanced, MRI, etc)                                                                                                                               |                 |           |
| Pharmacy or access to advanced pharmacology or other medications                                                                                                               |                 |           |
| Laboratory                                                                                                                                                                     |                 |           |
| Diagnostic imaging (radiography)                                                                                                                                               |                 |           |
| Access to pharmacy                                                                                                                                                             |                 |           |
| Exam, treatment, basic emergency supplies                                                                                                                                      |                 |           |
| Passive therapy equipment (treatment table, hot/cold packs, acupuncture needles)                                                                                               |                 |           |
| Technological resources (electronic communications, electronic medical records, etc)                                                                                           |                 |           |
| Clinic office equipment and furniture                                                                                                                                          |                 |           |
| Sanitation and cleaning supplies                                                                                                                                               |                 |           |

|                                                                                                                                                 | yes | no |
|-------------------------------------------------------------------------------------------------------------------------------------------------|-----|----|
| <b>Human resources</b>                                                                                                                          |     |    |
| Person with training to deliver community health spine programs for primary and secondary prevention                                            |     |    |
| Health care support staff, nurse, aide, public health worker or technician                                                                      |     |    |
| Health care provider with training in spine care at primary care level                                                                          |     |    |
| Person with minimal health training in screening to triage spine conditions                                                                     |     |    |
| Specialists with training in spine care at secondary care level                                                                                 |     |    |
| Laboratory technician (or provider with skills)                                                                                                 |     |    |
| Pharmacist or pharmacy technician                                                                                                               |     |    |
| Diagnostic imaging technician (or provider with skills)                                                                                         |     |    |
| Advanced specialists and sub-specialists with training in spine care at a tertiary care level, including emergency spine surgery, imaging, etc. |     |    |
| Support staff for Specialists (surgical nurse, etc)                                                                                             |     |    |
| Office support staff, record keeping staff                                                                                                      |     |    |
|                                                                                                                                                 |     |    |
| <b>Facility and infrastructure</b>                                                                                                              |     |    |
| Community Health and Public Health Programs                                                                                                     |     |    |
| Health care clinic                                                                                                                              |     |    |
| Pharmacy or dispensary                                                                                                                          |     |    |
| Hospital or facility for surgery and advanced interventions                                                                                     |     |    |
| Emergency/Trauma facility                                                                                                                       |     |    |
